# Supplementary material for: Federal Nutrition Assistance for Young Children: Underutilized and Unequally Accessed
Source: PubMed Central journal article supplement — Am J Prev Med. Author manuscript; Available in PMC 2024 Apr 8. (PMC11000260; doi:10.1016/j.amepre.2023.09.008), 2023-09-13

# Federal Nutrition Assistance for Young Children: Under-utilized and Unequally Accessed

Tatiana Andreyeva, Timothy E. Moore, Lucas da Cunha Godoy, Erica L. Kenney

American Journal of Preventive Medicine

Appendix Figure 1

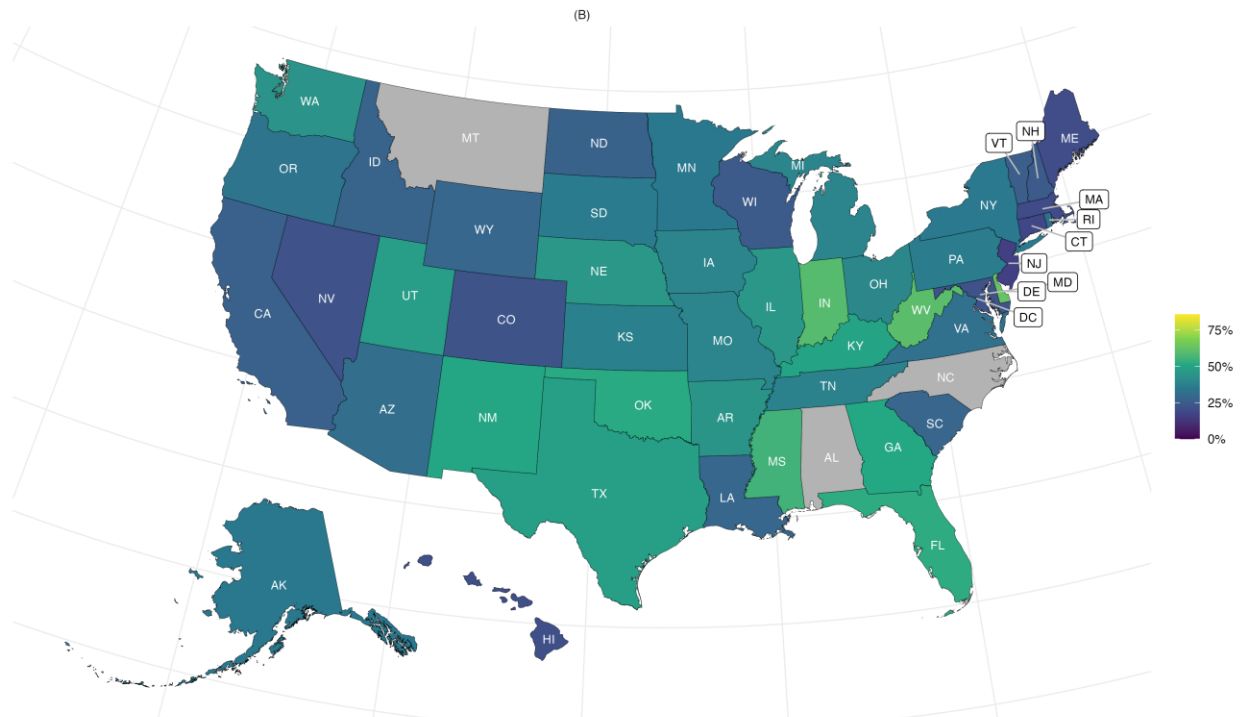

# Federal Nutrition Assistance for Young Children: Under-utilized and Unequally Accessed

Tatiana Andreyeva, Timothy E. Moore, Lucas da Cunha Godoy, Erica L. Kenney

American Journal of Preventive Medicine

Appendix Figure 2

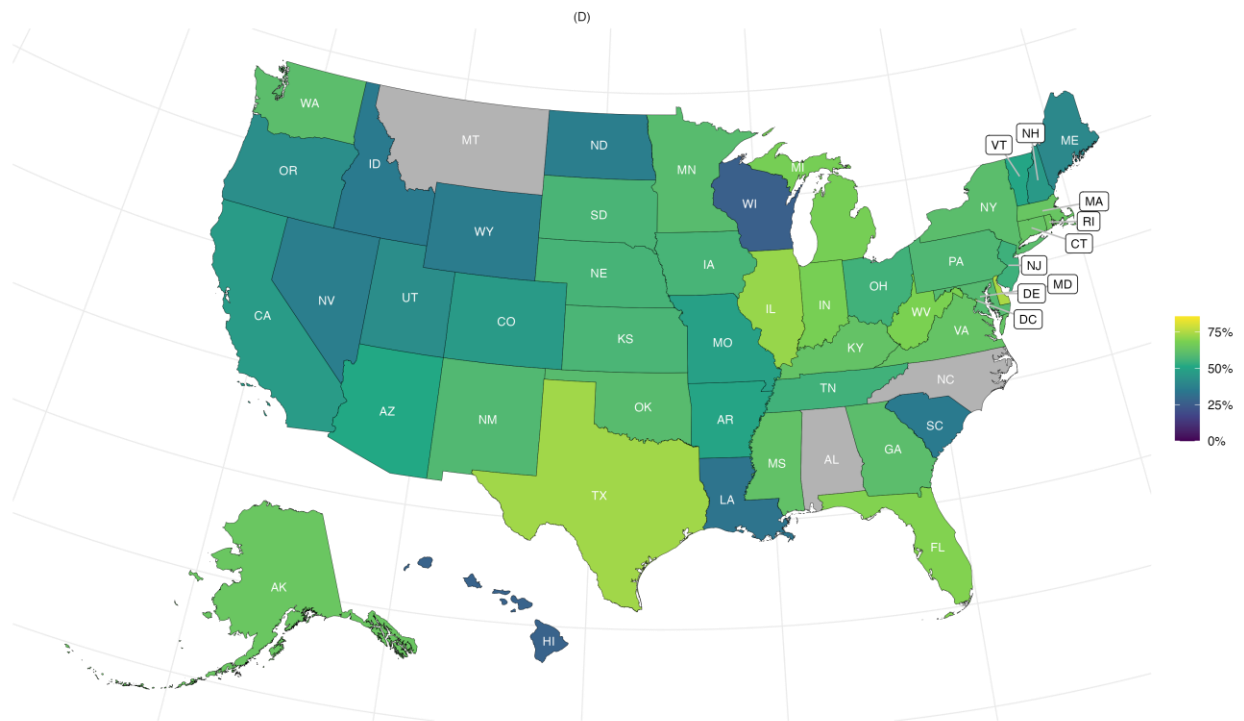

Supplement: NIHMS1979826-supplement-appendix.pdf [file NIHMS1979826-supplement-appendix.pdf]
